# Supplementary material
Source: PubMed Central journal article supplement (PMC4248821)
Supplement: JB.02037-14_zjb999093366so1.pdf [file JB.02037-14_zjb999093366so1.pdf]

**TABLE S1** Primers used in this study

| Gene disruption in <i>C. acetobutylicum</i>                 |                                                                                                                                                                                                                                                                   |                                                                                                                                                                                                                                                             |
|-------------------------------------------------------------|-------------------------------------------------------------------------------------------------------------------------------------------------------------------------------------------------------------------------------------------------------------------|-------------------------------------------------------------------------------------------------------------------------------------------------------------------------------------------------------------------------------------------------------------|
| <i>rex</i> -inactivated mutant (CAC2713)                    | IBS: 5'- AAAACTCGAGATAATTATCCTTAGGAGTCCTTGCTGTGCGCCCAGATAGGGTG -3'<br>EBS1d: 5'- CAGATTGTACAAATGTGGTGATAACAGATAAGTCCTTGCTTATAACTTACCTTTCTTTGT -3'<br>EBS2: 5'- TGAACGCAAGTTTCTAATTTTCGATTACTCCTCGATAGAGGAAAGTGTCT -3'<br>EBS: 5'- CGAAATTAGAACTTGCGTTCAGTAAAC -3' | The primer IBS, EBS1d and EBS2,EBS, which were designed using the InGex Intron Prediction Program ( <a href="http://www.Sigma-Aldrich.com/Targetronaccess">www.Sigma-Aldrich.com/Targetronaccess</a> ), were used to amplify the targetron target sequence. |
| Confirmation of gene disruption in <i>C. acetobutylicum</i> |                                                                                                                                                                                                                                                                   |                                                                                                                                                                                                                                                             |
| <i>rex</i> -inactivated mutant (CAC2713)                    | 5'- GTGGATAAGAAAAAAAACATATC -3'<br>5'- CTAATCTCGGCTTTTATTAC -3'                                                                                                                                                                                                   |                                                                                                                                                                                                                                                             |
| Gene complementation in <i>C. acetobutylicum</i>            |                                                                                                                                                                                                                                                                   |                                                                                                                                                                                                                                                             |
| <i>rex</i> -complemented strain (CAC2712)                   | 5'- <u>aactgcag</u> GTGGATAAGAAAAAAAACATATC -3'<br>5'- <u>acgcgtc</u> gacCTAATCTCGGCTTTTATTAC -3'                                                                                                                                                                 | Introduced restriction sites (PstI for the 5'-end and SalI for the 3'-end) are underlined.                                                                                                                                                                  |
| Quantitative RT-PCR analysis of gene expression             |                                                                                                                                                                                                                                                                   |                                                                                                                                                                                                                                                             |

|                       |                                                                 |  |
|-----------------------|-----------------------------------------------------------------|--|
| <i>ldh</i> (CAC0267)  | 5'- CGGTGGACTTGCATCTGAG -3'<br>5'- GCTGCTCCCCGCTGTTATT -3'      |  |
| <i>nadA</i> (CAC1025) | 5'- AAAAGCTAAGCACCCCTAATG-3'<br>5'- TACAGAAGCCATCCCATA-3'       |  |
| <i>nadB</i> (CAC1024) | 5'- ATTATTGGCACAGGGGTTG -3'<br>5'- GTGTCATCAACAAATAGAGGC -3'    |  |
| <i>nadC</i> (CAC1023) | 5'- GCTTAGAGGGCACAGGGG -3'<br>5'- CGTCCAAGGTTTCCGTTTC -3'       |  |
| <i>asrT</i> (CAC1512) | 5'- GCATTTATTACCTGTGGATTG -3'<br>5'- TATACTCCTTTCTTCTGCCTTG -3' |  |
| <i>asrA</i> (CAC1511) | 5'- AAAGAAGCAGAAGGACCTAAG -3'<br>5'- CACTCGCATCATACATATCAGC -3' |  |
| <i>asrB</i> (CAC1510) | 5'- AGGTGTCGTGGAGTATTTG -3'<br>5'- CAGATGCTTCCTTTACATTCTG -3'   |  |
| <i>asrC</i> (CAC1509) | 5'- ATTATGGAGACGGTTCTGTTTC -3'<br>5'- GGCATACACGATTTCCCAC -3'   |  |

|                        |                                                                 |  |
|------------------------|-----------------------------------------------------------------|--|
| <i>crt</i> (CAC2712)   | 5'- TTTAGGAGGCGGATGCG -3'<br>5'- TGCCATGCCCATTCCAAC -3'         |  |
| <i>bcd</i> (CAC2711)   | 5'- GCAATGAAAACCTTTGATGG -3'<br>5'- GTATGGAAGTCCTGCTTG -3'      |  |
| <i>etfB</i> (CAC2710)  | 5'- CTTTGGCTATGGGTGCTG -3'<br>5'- CTATTTCTGGTCCAACCTGAG -3'     |  |
| <i>etfA</i> (CAC2709)  | 5'- TATTAGTTGCTGGTGGTAGAGG -3'<br>5'- ATCTGAATCTTGCATACCTGC -3' |  |
| <i>hbd</i> (CAC2708)   | 5'- CGGAACAGTTGACCTTAATATG -3'<br>5'- TCTTTTAGTTGCTGATGCCAC -3' |  |
| <i>thlA</i> (CAC2873)  | 5'- GCAGTAAGAACAGCGATTGG -3'<br>5'- TGCCTGTCTTGCTGGATTC -3'     |  |
| <i>ptb</i> (CAC3076)   | 5'- TATCAGAAGAAGCAGCAC-3'<br>5'- CAACTAAGATTCCCTCC-3'           |  |
| <i>buk</i> (CAC3075)   | 5'- AAAGATAAACGGCAAAGGC -3'<br>5'- TTACATACATGCTCGTTGTACG -3'   |  |
| <i>adhE2</i> (CAP0035) | 5'- GTTTCGGTTATGGCTACG -3'<br>5'- TTCAATGTCGTTAGTCCC -3'        |  |

|                        |                                                                    |  |
|------------------------|--------------------------------------------------------------------|--|
| <i>adhE1</i> (CAP0162) | 5'- GATGCAGCCGTTAAGAGTG -3'<br>5'- AGTGAGGGACCACCAGTTG -3'         |  |
| <i>ctfA</i> (CAP0163)  | 5'- TCTGGCTTAGGTGGTGTAC -3'<br>5'- CATCGGCTGTAAGAGGTAG -3'         |  |
| <i>ctfB</i> (CAP0164)  | 5'- TCAACTTGTAAACTTAGGTGTAGG -3'<br>5'- CACGGATTAGTGAAAACGAAAC -3' |  |
| <i>adc</i> (CAP0165)   | 5'- ACTTCGCCTGCATTTTC -3'<br>5'- GCTCTGGCACAACCTTTAC -3'           |  |
| <i>bdhA</i> (CAC3299)  | 5'- ACTTTCAGGAGTAGAGCCAAATC -3'<br>5'- TCCCATGTATCGCCATC -3'       |  |
| <i>bdhB</i> (CAC3298)  | 5'- CAGGATAGAATGGCAGAAGC -3'<br>5'- AAGACTTGAAGCCCACATTAG -3'      |  |
| <i>fprA1</i> (CAC1027) | 5'- CTGCCCCTAACCTTCATTG -3'<br>5'- TCTTCTCCACCCTCATCC -3'          |  |
| <i>nrer</i> (CAC2448)  | 5'- TCCTCACGCTGACGAAAT -3'<br>5'- GCTCTATACCTAAGATACCTCCAC -3'     |  |
| <i>fpA2</i> (CAC2449)  | 5'- TTATTGCCTCAAATGCTGG -3'<br>5'- ATGGCGAACTTTAGGACC -3'          |  |

|                                                                                  |                                                                                                    |                                                                                             |
|----------------------------------------------------------------------------------|----------------------------------------------------------------------------------------------------|---------------------------------------------------------------------------------------------|
| <i>dfx</i> (CAC2450)                                                             | 5'- TAGATGTTTCTGTAGGTTCCG -3'<br>5'- CTGCTTTCCATAGGCTGTG -3'                                       |                                                                                             |
| <i>gd</i> (CAC2777)                                                              | 5'- CAAAGTCCTACTTGGCTTCTC -3'<br>5'- GCCTACTACTATGTTTCCGTC -3'                                     |                                                                                             |
| <i>rd</i> (CAC2778)                                                              | 5'- GATCCAGCCGAAGGTGATC -3'<br>5'- CTTCAGATGGCTCAAATTGATC -3'                                      |                                                                                             |
| <i>rbr3B</i> (CAC3597)                                                           | 5'- AATGCCCGTATGTGGTG-3'<br>5'- GCAACTTCAGGGTATCCTTCTC -3'                                         |                                                                                             |
| <i>rbr3A</i> (CAC3598)                                                           | 5'- AATGCCCTGTATGTGGTGC-3'<br>5'- TGCTTGTCTTGCCATTGC -3'                                           |                                                                                             |
| CAC2679                                                                          | 5'- TGTTGTATGGAGAAGGCTGGGA-3'<br>5'- CACTTCCCTTTAAGGCATCGCGTA-3'                                   | Internal control                                                                            |
| Protein overexpression and purification                                          |                                                                                                    |                                                                                             |
| pET (CAC2713)                                                                    | 5'- <u>cgcgatcc</u> GTGGATAAGAAAAAAAAACATATC -3'<br>5'- <u>acgctcgac</u> CTAATCTCGGCTTTTATTCAC -3' | Introduced restriction sites (BamHI for the 5'-end and SalI for the 3'-end) are underlined. |
| pET(CAC2713)<br>(Q47K)                                                           | 5'-GCAGATACGCAAAGACCTAAATTG -3'<br>5'-CAATTTAGGTCTTTGCGTATCTGC -3'                                 |                                                                                             |
| Amplification of 180-bp DNA fragments from the upstream region of genes for EMSA |                                                                                                    |                                                                                             |

|                           |                                                                                |  |
|---------------------------|--------------------------------------------------------------------------------|--|
| CAC0267 ( <i>ldh</i> )    | 5'- AACTTCAATAGATGGGCTC -3'<br>5'- TTATCCCCTCCAATTACTA -3'                     |  |
| CAC1025 ( <i>nadA</i> )   | 5'- AGACAATCACATACACCCC -3'<br>5'- GTAAACAAGATACAGTAAAT -3'                    |  |
| CAC1512 ( <i>asrT</i> )   | 5'- ATCTAGACAGCTGAAGC -3'<br>5'- CATCTTCGAACACTTTA -3'                         |  |
| CAC2712 ( <i>crt</i> )    | 5'- GCTGTTTATTGCAAGAAGTGAATAAAAAGC -3'<br>5'- TTTTATTGTTAATATTATAACAAAGACG -3' |  |
| CAC2873 ( <i>thlA</i> )   | 5'- ATGCATAAGTTTAATTTTTTTTG -3'<br>5'- TCTAACTAACCTCCTAAATT -3'                |  |
| CAC3076 ( <i>ptb</i> )    | 5'-GGAGGCATAATATCAGCGGCTG-3'<br>5'-CATTAAAACCTCTTAATCACTG-3'                   |  |
| CAP0035 ( <i>adhE2</i> )  | 5'- TAGTATTTGGCAATAAAAATAG -3'<br>5'-TTACATTATTTACTTCTAATG -3'                 |  |
| Cbei_1009 ( <i>pflB</i> ) | 5'- CGCGAACTTATAGAAA -3'<br>5'- TTAGTTTTTCCTCCTTT -3'                          |  |
| Cbei_2181 ( <i>adhA</i> ) | 5'- TTTCTGAGGAATTACG -3'<br>5'- CCTAAAATTTGCTCAT -3'                           |  |

|                            |                                                          |                  |
|----------------------------|----------------------------------------------------------|------------------|
| Cbei_1722 ( <i>adhA2</i> ) | 5'- AAGTTAGAACCTTGTA -3'<br>5'- TACCTCCTAAAATTCA -3'     |                  |
| Cbei_1464 ( <i>butA</i> )  | 5'- CCTAAATAACGCAAAA -3'<br>5'- CACCATTAAGTGAAGTTTA -3'  |                  |
| Cbei_0327 ( <i>hydB</i> )  | 5'- AAAAGAAGTGGAATG -3'<br>5'- CTCCCATGAATAATTT -3'      |                  |
| Cbei_4319 ( <i>fld</i> )   | 5'-GCACAAATTATACAATC-3'<br>5'-GTTCGCAAGTGCTTCTAT-3'      |                  |
| Cbei_1014 ( <i>ldh</i> )   | 5'- ATCTTCTGCGTAAAAC -3'<br>5'- TTGCTCATAACAACCTT -3'    | Negative control |
| NT0278 ( <i>ctfA</i> )     | 5'- CTAAATATTTAAAAAAT -3'<br>5'- TAACTACACCCCATG -3'     |                  |
| CTC01488 ( <i>frdA</i> )   | 5'- GTAGTTCTTAATTAGAG -3'<br>5'- CATTTTCCCCCTATCTT -3'   |                  |
| CBO0246 ( <i>maeB</i> )    | 5'- GTTAAGCATAAAAATAT -3'<br>5'- CACCATTAAGTGAAGTTTA -3' |                  |
| CPF_0728 ( <i>noxE</i> )   | 5'- AAATTCTTTGTTTAAAG-3'                                 |                  |

|                                                      |                                                                                 |                  |
|------------------------------------------------------|---------------------------------------------------------------------------------|------------------|
|                                                      | 5'- TATATTTCCACCTTTC -3'                                                        |                  |
| CLJU_c39440 ( <i>bcd2</i> )                          | 5'-GATAACGATAACATTG-3'<br>5'-GTATTTCTTCAAAAAGGTC-3'                             |                  |
| CLJU_c37670 ( <i>codH</i> )                          | 5'- CACACGCAATTGCATA -3'<br>5'- GTAATAAATACAATTAT -3'                           |                  |
| Ccarb_5267 ( <i>narB</i> )                           | 5'- CCATGATATACTTACAAT -3'<br>5'- GGCGCAATAATTACATG -3'                         |                  |
| Ccarb_4501 ( <i>narK</i> )                           | 5'- GTATAGTGATATACTT -3'<br>5'- GCAAACCCTACAAAAAAC -3'                          |                  |
| Ccarb_2944 ( <i>codH</i> )                           | 5'- CAAATTGGATTTTGAA -3'<br>5'- GTATATAAAAATTACA -3'                            |                  |
| Ccarb_5251 ( <i>grdIH</i> )                          | 5'- CAAATTTCTATAGCATGAAATC -3'<br>5'- GTTGAAATTGTCTAAATAGTAC -3'                |                  |
| Ccarb_1246 ( <i>crt</i> )                            | 5'- AAACAATCTGCATTTGACCA -3'<br>5'- ACCCCATCTTATCCCTCCT -3'                     | Negative control |
| CAC2712 ( <i>crt</i> )T <sub>5</sub> -G <sub>5</sub> | 5'- TTTGCTGATTGCAAGAAGTGAATAAAAAGC -3'<br>5'- TTTTTATTGTTAATATTATCACAAAGACG -3' |                  |



|                                                                                           |                                                                                |  |
|-------------------------------------------------------------------------------------------|--------------------------------------------------------------------------------|--|
| CAC2712 ( <i>crt</i> )A <sub>14</sub> -C <sub>14</sub>                                    | 5'- TTTGCTGATTGCAAGAAGTGAATAAAAAGC -3'<br>5'- TTTTATTGTGAATATTATAACAAAGACG -3' |  |
| CAC2712 ( <i>crt</i> )<br>T <sub>5</sub> -G <sub>5</sub> A <sub>14</sub> -C <sub>14</sub> | 5'-TTTGCTGATTGCAAGAAGTGAATAAAAAGC -3'<br>5'- TTTTATTGTGAATATTATCACAAAGACG -3'  |  |

**TABLE S2** Reconstructed Rex regulons in clostridia.

| First Gene ID                        | Operon                       | Candidate Rex-binding sites | Position <sup>a</sup> | Score <sup>b</sup> | TSS position <sup>c</sup> |
|--------------------------------------|------------------------------|-----------------------------|-----------------------|--------------------|---------------------------|
| <i>C. acetobutylicum</i> ATCC 824    |                              |                             |                       |                    |                           |
| CAC2712                              | <i>crt-bcd-etfB-etfA-hbd</i> | TTGTTATAATATTAACAA          | -45                   | 5.6                | -126                      |
| CAC3076                              | <i>ptb-buk</i>               | ACGTTAATCATTTAACAT          | -52                   | 4.8                | -55                       |
| CAC0267                              | <i>ldh</i>                   | TAGTTAATAAATTAACAA          | -98                   | 5.6                | -97                       |
| CAP0035                              | <i>adhE2</i>                 | TTGTTAAATGTTTGACAA          | -262                  | 4.9                | -159,-215                 |
| CAC2873                              | <i>thlA</i>                  | TTGTGTTTTTTTTTAACAA         | -161                  | 4.6                | -105                      |
| CAC1025                              | <i>nadABC</i>                | TTGATAAATATCTAACAA          | -110                  | 5.3                | -40                       |
| CAC1512                              | <i>asrTABC</i>               | TTGTTATATTTTTTAACAA         | -42                   | 5.5                | -86                       |
| <i>C. beijerinckii</i> NCIMB 8052    |                              |                             |                       |                    |                           |
| Cbei_4319                            | <i>fld-pfor</i>              | AAGTTAATTATTTAACAA          | -37                   | 5.5                | -61                       |
| Cbei_1464                            | <i>butA</i>                  | ATGTGAATTAATTAACAA          | -41                   | 5.3                | -120                      |
| Cbei_0321                            | <i>crt-bcd-etfBA</i>         | TTGTTATATTATTAACAA          | -87                   | 5.5                | -168                      |
| Cbei_0325                            | <i>hbd</i>                   | AAGTTAATAATGTAACAT          | -146                  | 4.8                | -48                       |
| Cbei_0325                            | <i>hbd</i>                   | AAGATAATTAATTAACAA          | -126                  | 5.3                | -48                       |
| Cbei_0411                            | <i>thlA</i>                  | TTGTTTAAATTTTAACAA          | -118                  | 5.4                | -57                       |
| Cbei_0411                            | <i>thlA</i>                  | ATGTTAATAATTTAACAA          | -58                   | 5.7                | -57                       |
| Cbei_0327                            | <i>hydB</i>                  | TTGTTATAATTTTAACAA          | -84                   | 5.6                | -33                       |
| Cbei_0327                            | <i>hydB</i>                  | ATGTTAATAATTTATCAT          | -287                  | 5.3                | -33                       |
| Cbei_1722                            | <i>adhA2</i>                 | TTGATAAAAATAATAACAT         | -99                   | 5.3                | -272                      |
| Cbei_2181                            | <i>adhA</i>                  | TTGATAAAAATAATCACAA         | -129                  | 5.1                | -243                      |
| Cbei_0203                            | <i>ptb-buk</i>               | TTGATATAAAATTTAACAA         | -74                   | 5.6                | -159                      |
| Cbei_3630                            | <i>thlA2</i>                 | TTGTTAAAAAAAATAACAA         | -48                   | 5.8                | -42                       |
| Cbei_1009                            | <i>pflBA</i>                 | TTGATTAAAAATTAACAA          | -52                   | 5.4                | -85,-546                  |
| <i>C. botulinum</i> A str, ATCC 3502 |                              |                             |                       |                    |                           |

|                            |                              |                     |      |      |          |
|----------------------------|------------------------------|---------------------|------|------|----------|
| CBO3202                    | <i>crt-hbd-thl-bcd-ETFBA</i> | TAGATAAAATTTTATCAT  | -136 | 5    | -316     |
| CBO3202                    | <i>crt-hbd-thl-bcd-ETFBA</i> | TTGTTAAAATAATAGCTA  | -93  | 4.8  | -316     |
| CBO1643                    | <i>adhA</i>                  | TAGTTATTATTTTATCAT  | -261 | 4.8  | -86,-460 |
| CBO1519                    | <i>ldh</i>                   | ATGTTAATTAATTAACATA | -161 | 5.3  | -259     |
| CBO2217                    | <i>butA</i>                  | ATGTTAATTAATTAACAT  | -51  | 5.5  | -55,-363 |
| CBO1579                    | <i>alsT-noxE-yeeE</i>        | TTGAGAGAAAATTAACAA  | -144 | 5    | -98      |
| CBO0345                    | <i>adhE2</i>                 | ATGATAAATATTTAACAA  | -178 | 5.7  | -293     |
| CBO0345                    | <i>adhE2</i>                 | TTGTTAAAATAAATAACAA | -121 | 5.8  | -293     |
| CBO0246                    | <i>maeB</i>                  | TTGTTAATAATATAACAA  | -145 | 5.7  | -50,-350 |
| <i>C. butyricum</i> 5521   |                              |                     |      |      |          |
| CBY_3041                   | <i>crt-bcd-ETFBA-hbd</i>     | TTGTTATAATATTAACAA  | -98  | 5.6  | -286     |
| CBY_2919                   | <i>ptb-buk</i>               | TTGATATAATTTTAACAA  | -55  | 5.4  | -196     |
| CBY_1290                   | <i>thlA</i>                  | ATGTTAATAATTTAACGA  | -81  | 5.4  | -30      |
| CBY_1290                   | <i>thlA</i>                  | TTGTCTAAAATTTAACAA  | -140 | 5.3  | -30      |
| CBY_3751                   | <i>adhA</i>                  | ATGATAAAAATATTACAA  | -122 | 5    | -32      |
| CBY_3747                   | <i>adhA2</i>                 | TTGACAAAAAAATAACAA  | -92  | 5.4  | -122     |
| CBY_3643                   | <i>fld-pfor</i>              | AAGTTAATTATTTAACAA  | -37  | 5.5  | -63      |
| CBY_3753                   | <i>adhE2</i>                 | GTGTTAAAAAAATAACAA  | -104 | 5.5  | -20,-320 |
| CBY_3753                   | <i>adhE2</i>                 | TTGACAAAAAAATAACAA  | -146 | 5    | -20,-320 |
| CBY_2357                   | <i>maeB</i>                  | TTGTTAAAAAAGTAACAA  | -145 | 5.4  | -227     |
| CBY_2472                   | <i>butA</i>                  | ATGTGAATTAATTAACAA  | -41  | 5.3  | -144     |
| CBY_3325                   | <i>narAB</i>                 | TTATTAATTTTTTAACAA  | -170 | 4.89 | -166     |
| CBY_3325                   | <i>narAB</i>                 | TTGTTAAAAAAAGAACAA  | -149 | 5.02 | -166     |
| <i>C. kluyveri</i> DSM 555 |                              |                     |      |      |          |
| CKL_0454                   | <i>crt-bcd-ETFBA-hbd</i>     | TTGTGATATTATTAACAA  | -64  | 5.1  | -97      |
| <i>C. novyi</i> NT         |                              |                     |      |      |          |

|                                  |                          |                     |      |     |          |
|----------------------------------|--------------------------|---------------------|------|-----|----------|
| NT01CX_0604                      | <i>hbd-thlA</i>          | ATGATATATATTTAACAA  | -233 | 5.4 | -278     |
| NT01CX_0604                      | <i>hbd-thlA</i>          | AAGTTAAAAAATTAACAA  | -46  | 5.6 | -278     |
| NT01CX_0474                      | <i>crt-bcd-etfBA-hbd</i> | TTGTTACTATATTAACAA  | -69  | 5.2 | -117     |
| NT01CX_2324                      | <i>bcd-etfBA</i>         | GTGTTTTTTTTTTAACAA  | -114 | 4.7 | -52      |
| NT01CX_0464                      | <i>hydB</i>              | ATGTTACATATTTAACAA  | -97  | 5.3 | -106     |
| NT01CX_0468                      | <i>adhA</i>              | TTGTTAATAAAAATAACAA | -61  | 5.7 | -53      |
| NT01CX_0309                      | <i>alsT-noxE-yeeE</i>    | TTGAGAGAAATTTAACAA  | -30  | 5.1 | -196     |
| NT01CX_0278                      | <i>ctfAB</i>             | ATGACAAAAATTTAACAA  | -90  | 5.4 | -53,-400 |
| <i>C. perfringens</i> ATCC 13124 |                          |                     |      |     |          |
| CPF_2585                         | <i>crt-bcd-etfBA-hbd</i> | TTGTTACAAAATTAACAA  | -124 | 5.5 | -161     |
| CPF_2657                         | <i>ptb-buk</i>           | GTGTTTAAAAATTTAACAA | -190 | 5.2 | -117     |
| CPF_2657                         | <i>ptb-buk</i>           | TTGTTATAAATTTAACAA  | -43  | 5.7 | -117     |
| CPF_2460                         | <i>thlA</i>              | TTGATAAATTTTTACCTA  | -35  | 4.7 | -55      |
| CPF_2460                         | <i>thlA</i>              | TTGTTTAAAAATTTAACAA | -115 | 5.6 | -55      |
| CPF_0098                         | <i>ldh</i>               | TTGTTATATAATTAACCTT | -64  | 5.1 | -42,-342 |
| CPF_2855                         | <i>adhE2</i>             | TTGATAAAAAAATCACAA  | -286 | 5.2 | -225     |
| CPF_2855                         | <i>adhE2</i>             | TAGTTAAAAAATAACGA   | -266 | 5.3 | -225     |
| CPF_0728                         | <i>noxE</i>              | TAGATAAAAAATTTAACAA | -60  | 5.6 | -221     |
| CPF_2052                         | <i>narAB-noxA</i>        | ATGATAAATTTTTAACAA  | -47  | 5.5 | -214     |
| <i>C. tetani</i> E88             |                          |                     |      |     |          |
| CTC01847                         | <i>frdA2</i>             | TAGTTAATATTTTAACAA  | -40  | 5.5 | -33      |
| CTC01178                         | <i>noxE-yeeE</i>         | TTGAAAGAAATTTAACAA  | -141 | 5.1 | -59,-438 |
| CTC02427                         | <i>crt-bcd-etfBA-hbd</i> | TTGTTATAAATTCACAA   | -245 | 5   | -88      |
| CTC02427                         | <i>crt-bcd-etfBA-hbd</i> | TTGTTATAATATTAACAA  | -104 | 5.6 | -88      |
| CTC00312                         | <i>thlA</i>              | TTGTTAATTTTTTAACCTA | -64  | 5.3 | -77      |
| CTC00710                         | <i>bcd-etfBA</i>         | AAGTTAGTTATTTAACAA  | -64  | 5.1 | -20      |

|                                 |                                                       |                     |      |      |                       |
|---------------------------------|-------------------------------------------------------|---------------------|------|------|-----------------------|
| CTC02422                        | <i>adhA</i>                                           | AAGTTAAGTTATTAACAA  | -157 | 4.8  | -67                   |
| CTC02422                        | <i>adhA</i>                                           | ATGTTAAAAATATATCAA  | -50  | 5.4  | -67                   |
| CTC02417                        | <i>hydB</i>                                           | CTGTTAATAAATTAACAA  | -84  | 5.3  | -38                   |
| CTC02546                        | <i>ptb-buk</i>                                        | TAGTTAAAAAGATATCAA  | -48  | 4.8  | -73                   |
| CTC01366                        | <i>adhE2</i>                                          | TTGTTATATAATTAACAT  | -139 | 5.5  | -225                  |
| CTC01488                        | <i>frdA</i>                                           | TTGACAAAATATTAACAA  | -147 | 5.4  | -172                  |
| <i>C. cellulovorans</i> 743B    |                                                       |                     |      |      |                       |
| Clocel_1811                     | <i>pflBA</i>                                          | ATGTTAATTATTTAACAT  | -68  | 5.27 | -228                  |
| Clocel_2402                     | <i>adhE2</i>                                          | TTGTTAAATTAATAACAA  | -175 | 5.48 | -40,-515              |
| Clocel_2976                     | <i>crt-bcd-etfBA-hbd</i>                              | TTGTTAATTTAATAACAA  | -105 | 5.37 | -70                   |
| Clocel_2976                     | <i>crt-bcd-etfBA-hbd</i>                              | TTGTTAATTTAATAACAA  | -40  | 5.37 | -70                   |
| <i>C. carboxidivorans</i> P7    |                                                       |                     |      |      |                       |
| Ccarb_1085                      | <i>adhA</i>                                           | TTGTGAAAAATATAACCA  | -184 | 4.74 | -96                   |
| Ccarb_2944                      | <i>codH-cooC-fhs-fchA-folD-metF-lpdA-cooC-acsDCEB</i> | ATGTTTAATTTTTAACGT  | -193 | 4.57 | -95,-498,-841 , -1289 |
| Ccarb_4269                      | <i>ptb-buk</i>                                        | ATGATTAAAAAATTTACAA | -1   | 4.81 | -57,-462              |
| Ccarb_4321                      | <i>adhE2</i>                                          | TTGTTAAAAAAATAACGA  | -290 | 5.23 | -160,-488             |
| Ccarb_4321                      | <i>adhE2</i>                                          | TTGACAAATAATAACTA   | -195 | 4.57 | -160,-488             |
| Ccarb_4500                      | <i>asrTABC</i>                                        | TTGTGATATATTTATCAT  | -192 | 4.82 | -169                  |
| Ccarb_5154                      | <i>crt</i>                                            | AAGTTAAATTATTAACGA  | -140 | 4.9  | -23,-235              |
| Ccarb_5154                      | <i>crt</i>                                            | ATGTTAATAATTTAACTA  | -117 | 5.28 | -23,-235              |
| Ccarb_5251                      | <i>grdIH</i>                                          | TTGATAATTTAATAACAA  | -145 | 5.26 | -149                  |
| Ccarb_4501                      | <i>narK</i>                                           | AAGTTAAATAATTAACAA  | -52  | 5.44 | -34                   |
| Ccarb_4501                      | <i>narK</i>                                           | TTGAAATAAATATAATAA  | -30  | 4.5  | -34                   |
| Ccarb_5267                      | <i>narAB-noxA</i>                                     | AAGTTAAATAATTAACAA  | -93  | 5.44 | -54                   |
| <i>C. ljungdahlii</i> DSM 13528 |                                                       |                     |      |      |                       |
| CLJU_c18470                     | <i>adhA</i>                                           | TAGATAATATTTTAACAA  | -59  | 5.31 | -58                   |

|             |                                                       |                     |      |      |      |
|-------------|-------------------------------------------------------|---------------------|------|------|------|
| CLJU_c23220 | <i>butA</i>                                           | TAGTGAATATATTAACAG  | -69  | 4.51 | -26  |
| CLJU_c23770 | <i>asrABC-narKAB-noxA</i>                             | ATGTTAAATATATAACAA  | -69  | 5.46 | -70  |
| CLJU_c23770 | <i>asrABC-narKAB-noxA</i>                             | TTGATAATTTTTTAAAAA  | 29   | 4.77 | -70  |
| CLJU_c27840 | <i>grdIH</i>                                          | CTGTTATAAAAATAACAA  | -175 | 5.13 | -160 |
| CLJU_c27840 | <i>grdIH</i>                                          | GTGTTAAAATTTAAACAA  | -92  | 4.7  | -160 |
| CLJU_c37670 | <i>codH-cooC-fhs-fchA-folD-metF-lpdA-cooC-acsDCEB</i> | ATGTTTATTTTTTAACAT  | -185 | 4.89 | -112 |
| CLJU_c39440 | <i>bcd2-fldA-bcd-etfBA</i>                            | TTGTTATAAAAATACACAA | -29  | 4.75 | -262 |

<sup>a</sup> Positions of the 5' end of Rex sites are given relative to the translational start.

<sup>b</sup> Scores of candidate sites are the sum of positional nucleotide weights.

<sup>c</sup> The transcriptional start sites (TSS) of all the candidate Rex target operons are obtained based on prediction of the potential -10 and -35 promoter elements using the SoftBerry-BPROM (<http://linux1.softberry.com/berry.phtml?topic=bprom&group=programs&subgroup=gfindb>), except for CAC2712 (*crt*; Boynton et al., 1996), CAC3076 (*ptb*; Walter et al., 1993), CAP0035 (*adhE2*; Ref. 41), and CAC2873 (*thlA*; Stim-Herndon et al., 1995) genes whose TSS have been determined previously. Positions of the TSS are given relative to the translational start.

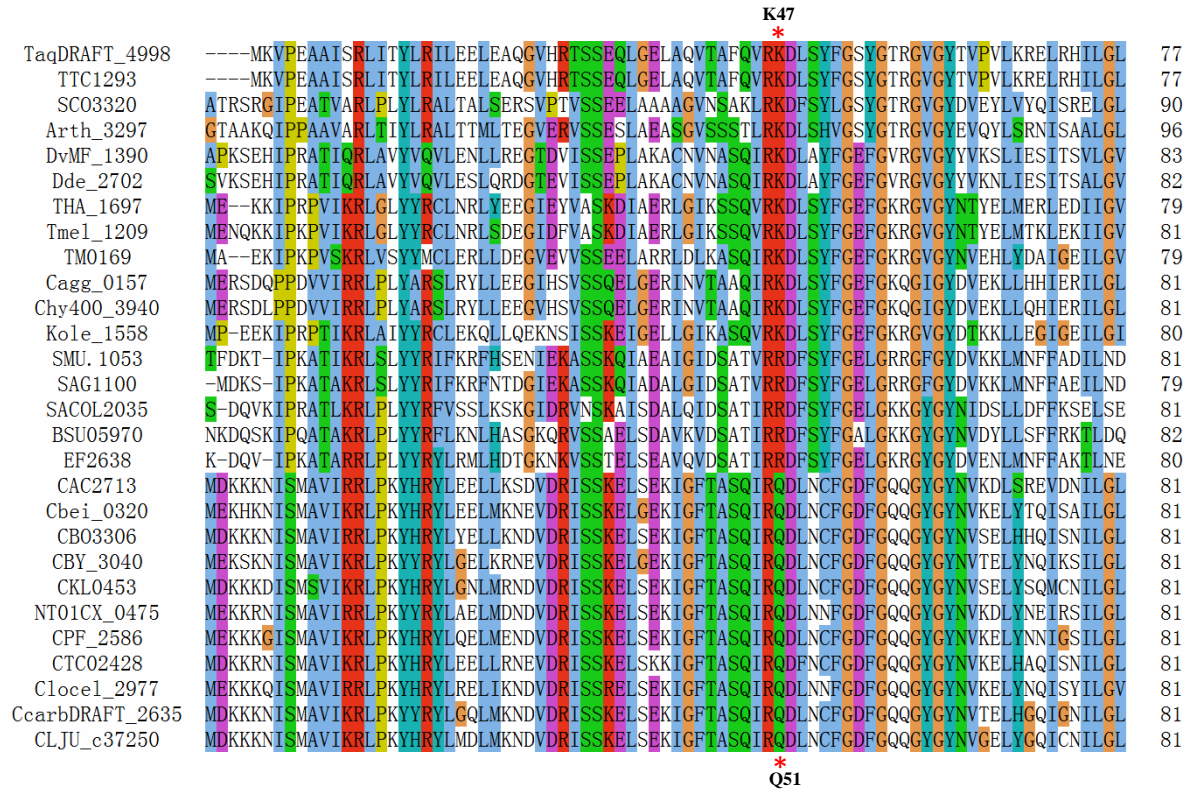

**FIG S1** Sequence alignment of N-terminal DNA-binding domain of Rex proteins from clostridia and other Gram-positive bacteria including *Thermus aquaticus* Y51MC23 (TaqDRAFT\_4998), *Thermus thermophilus* HB27 (TTC1293), *Streptomyces coelicolor* A3(2) (SCO3320), *Arthrobacter* sp. FB24 (Arth\_3297), *Desulfovibrio vulgaris* str. 'Miyazaki F' (DvMF\_1390), *Desulfovibrio desulfuricans* G20 (Dde\_2702), *Thermosiphon africanus* TCF52B (THA\_1697), *Thermosiphon melanesiensis* BI429 (Tme1\_1209), *Thermotoga maritima* MSB8 (TM0169), *Chloroflexus aggregans* DSM 9485 (Cagg\_0157), *Chloroflexus aurantiacus* Y-400-fl (Chy400\_3940), *Kosmotoga olearia* TBF 19.5.1 (Kole\_1558), *Streptococcus mutans* UA159 (SMU.1053), *Streptococcus agalactiae* 2603 V/R (SAG1100), *Staphylococcus aureus* subsp. *aureus* COL (SACOL2035), *Bacillus subtilis* 168 (BSU05970), *Enterococcus faecalis* strain V583 (EF2638), *Clostridium acetobutylicum* ATCC 824 (CAC2713), *Clostridium beijerinckii* NCIMB 8052 (Cbei\_0320), *Clostridium botulinum* A str, ATCC 3502 (CBO3306), *Clostridium butyricum* 5521 (CBY\_3040), *Clostridium kluyveri* DSM 555 (CKL0453), *Clostridium novyi* NT (NT01CX\_0475), *Clostridium perfringens* ATCC 13124 (CPF\_2586), *Clostridium tetani* E88 (CTC02428), *Clostridium cellulovorans* 743B (Cloce1\_2977), *Clostridium carboxidivorans* P7 (Ccarb\_2635), and *Clostridium ljungdahlii* DSM 13528 (CLJU\_c37250).

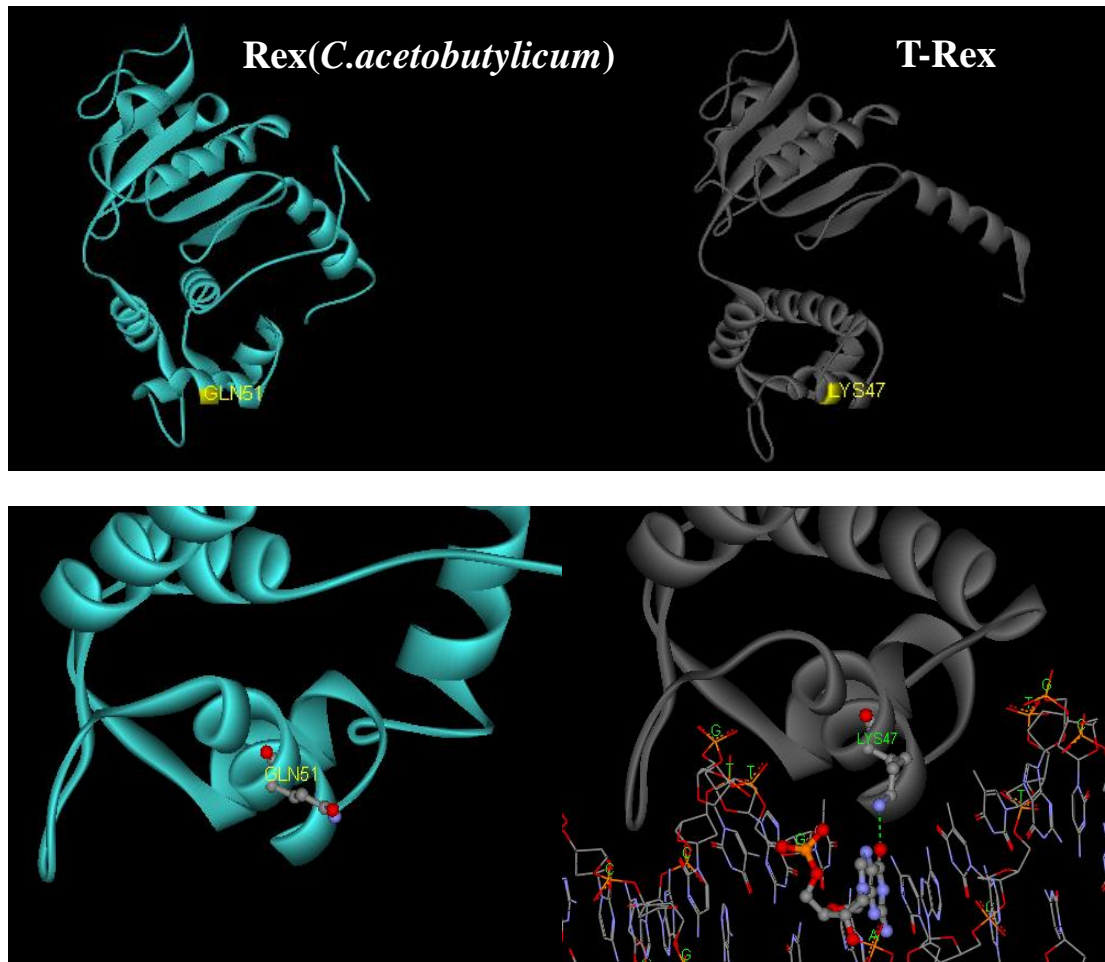

**FIG S2** Three-dimensional homology model of *C. acetobutylicum* Rex protein. The model was generated based on the known tertiary structure of the *T. aquaticus* Rex regulator (T-Rex) in complex with its DNA operator (Protein Data Bank [PDB] accession number 3IKT) using the software Discovery Studio 2.1. The Gln51 residue of *C. acetobutylicum* Rex and Lys47 of T-Rex are highlighted in yellow and shown with ball-and-stick representation. The hydrogen bond between Lys47 and guanine is shown by green dashes.



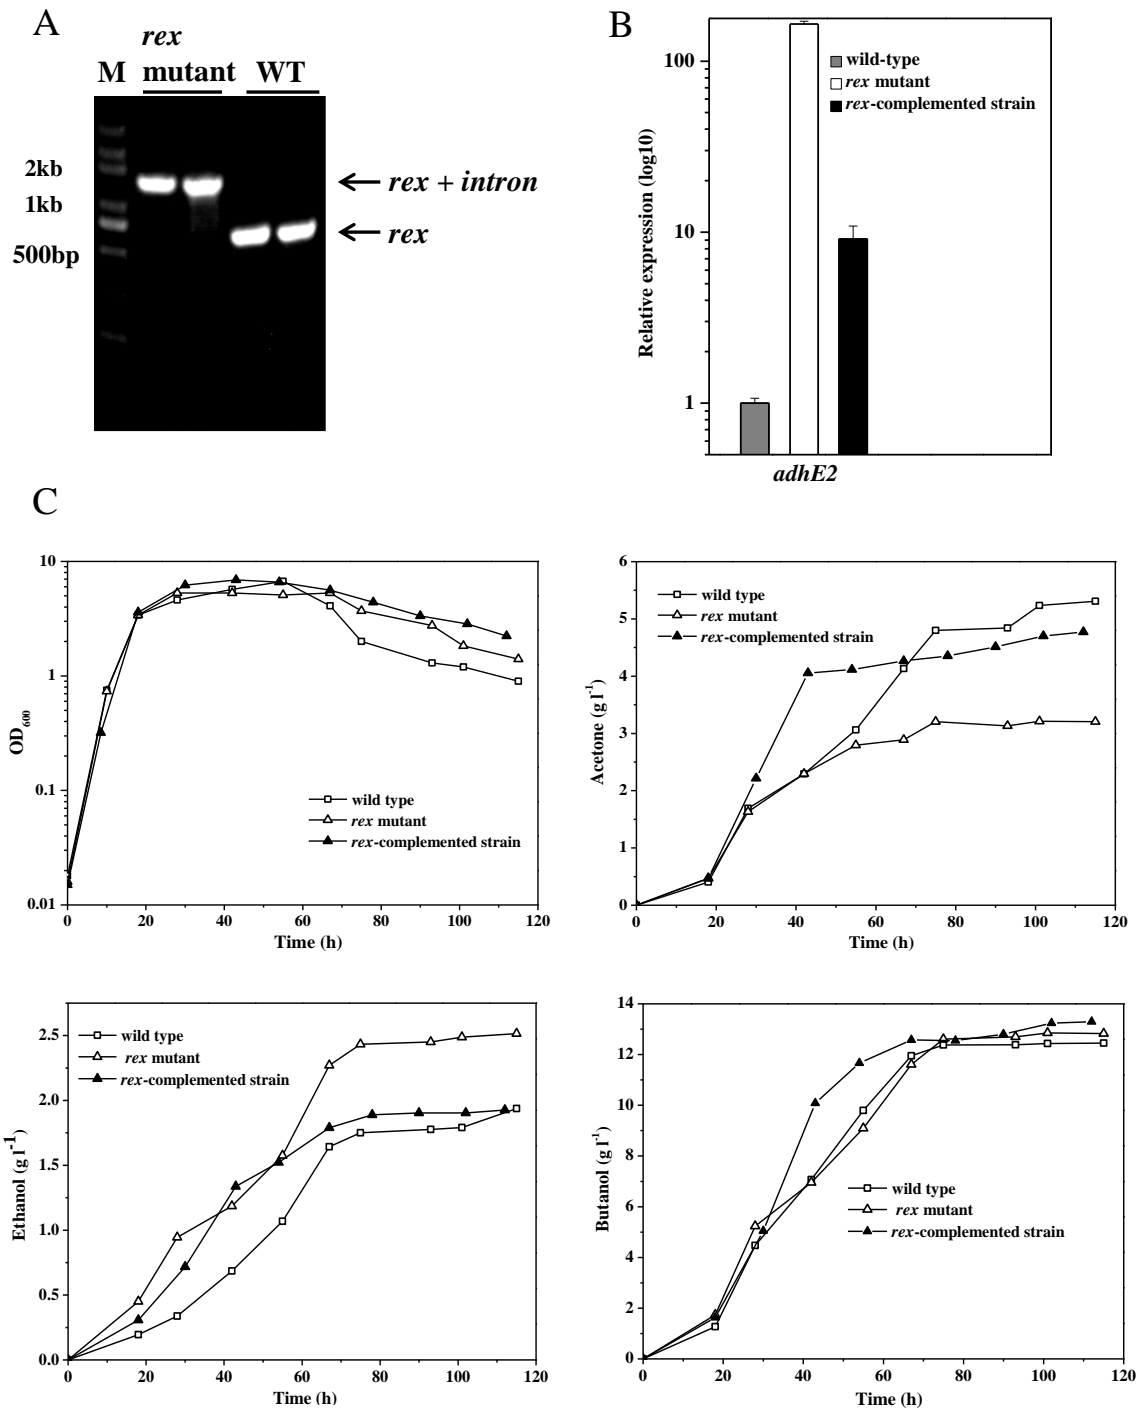

**FIG S3** Validation of the genotype of *C. acetobutylicum* *rex*-inactivated mutant. The mutant with intron insertion in *rex* gene was confirmed by PCR (A). Complementation of the *rex*-inactivated mutant by using a plasmid construct constitutively expressing *rex* resulted in a reduced expression level of *adhE2* gene compared to the gene expression in the *rex*-inactivated mutant (B) and a fermentation profile similar to that of the wild-type strain (C).

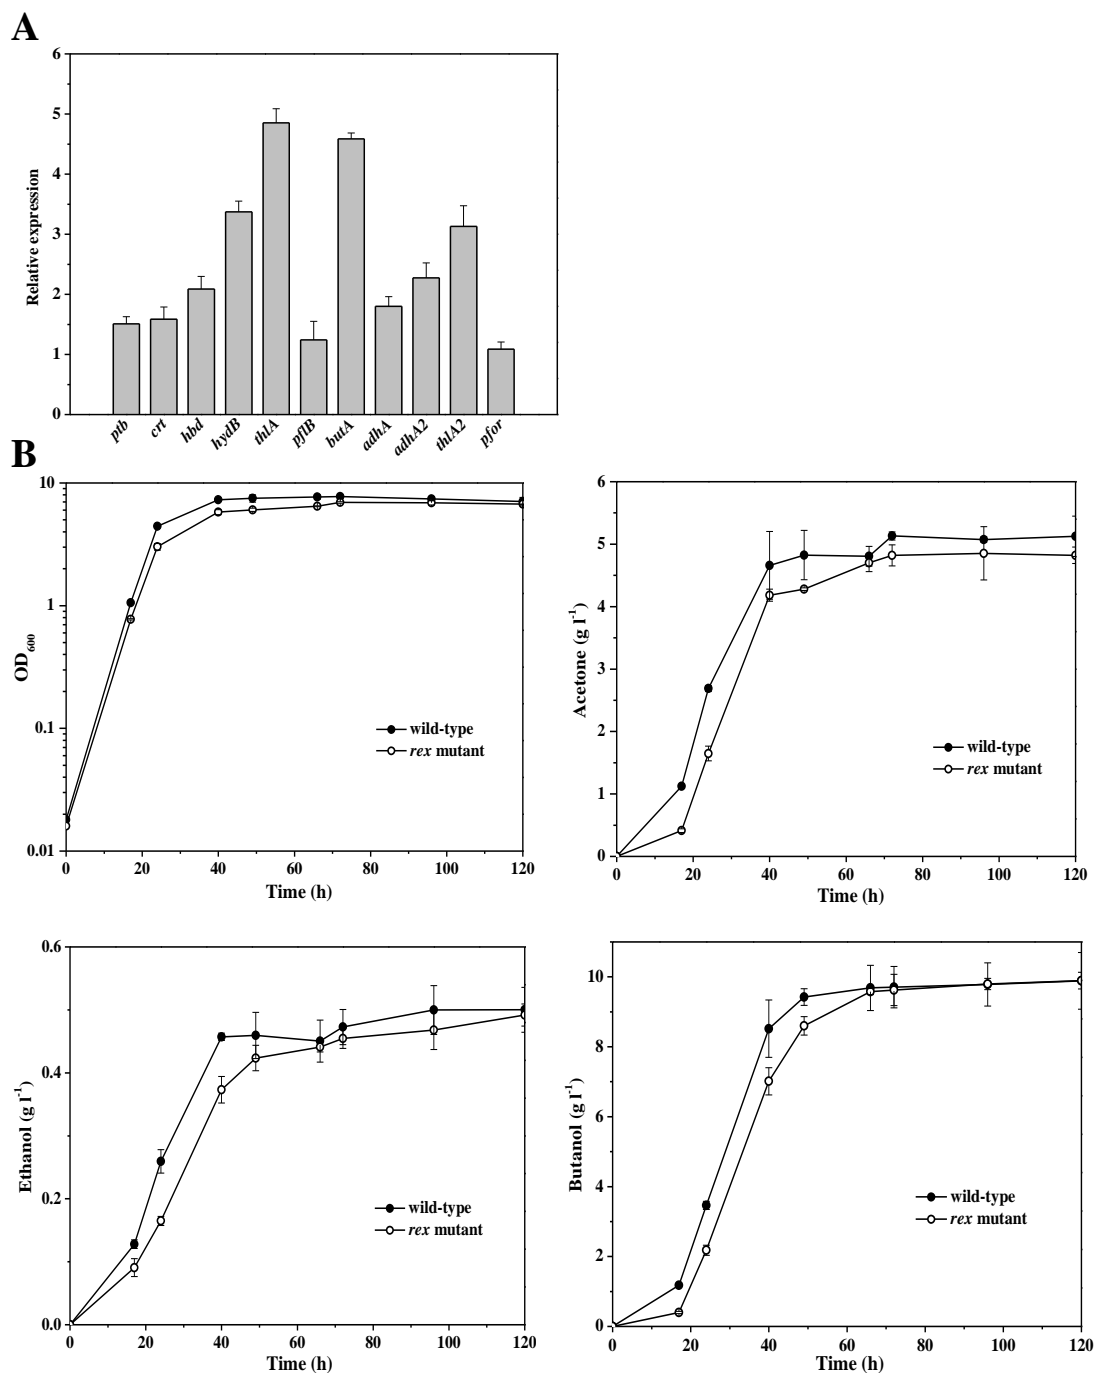

**FIG S4** Effect of *rex* inactivation on transcript levels of the predicted Rex targets (A) and fermentation product formation of *C. beijerinckii* (B). The *C. beijerinckii* wild-type and *rex*-inactivated mutant strains were grown in the XHP2 minimal medium (Xiao et al., 2012). The data points represent the average of three independent experiments.
